# Supplementary material for: High Prolactin Concentration Induces Ovarian Granulosa Cell Oxidative Stress, Leading to Apoptosis Mediated by L-PRLR and S-PRLR
Source: MDPI journal article supplement (doi:10.3390/ijms241914407), 2023-09-22
Supplement: s1 [file s1]

**Table S1.** Primer sequences of mRNAs and sgRNAs

| Gene            | Sequence 5'-3'                                                  | Size (bp) | Tm (°C) | Accession number |
|-----------------|-----------------------------------------------------------------|-----------|---------|------------------|
| <i>Bax</i>      | F: TGCTCACTGCCTCACTCACC<br>R: CCCAAGACCACTCCTCCCTA              | 179       | 60      | XM027978592.1    |
| <i>Bcl-2</i>    | F: GATGACCGAGTACCTGAACCG<br>R: GACAGCCAGGAGAAATCAAACA           | 120       | 60      | XM012103831.3    |
| <i>Caspase3</i> | F: GCTACAAGGTCCGTTATGCC<br>R: GATGCTGCCGTATTCGTTCTC             | 128       | 60      | XM015104559.2    |
| <i>L-PRLR</i>   | F: CCCCTTGTTCTCTGCTAAACCC<br>R: CTATCCGTCAACCGAGACACC           | 129       | 60      | O46561-1         |
| <i>S-PRLR</i>   | F: ACAGTAAGCGCCATCAACCA<br>R: CTGGCTTGCATCGAATCTGC              | 328       | 60      | O46561-2         |
| <i>GAPDH</i>    | F: GGTCCGAGTGAACGGATTTG<br>R: CTTGACTGTGCCGTGGAACCTT            | 222       | 60      | NM001190390.1    |
| L-PRLR-sgRNA    | F: Caccg CAAATCCTCGCAGTCAGAAG<br>R: Aaac CTTCTGACTGCGAGGATTG c  |           |         | O46561-1         |
| S-PRLR-sgRNA    | F: Caccg CTTATTAAATGTCGGTCTCC<br>R: Aaac GGAGACCGACATTTAATAAG c |           |         | O46561-2         |

**Table S2.** Reactions volume for RT-qPCR

| Name                          | Dose (μl) |
|-------------------------------|-----------|
| Ultra SYBR Mixture (2×)       | 10        |
| Forward primer (10 μM)        | 0.4       |
| Forward primer primer (10 μM) | 0.4       |
| cDNA template                 | 2         |
| Nuclease-free Water           | 7.2       |
| Total volume                  | 20        |
