# Supplementary material for: High Prolactin Concentration Induces Ovarian Granulosa Cell Oxidative Stress, Leading to Apoptosis Mediated by L-PRLR and S-PRLR
Source: MDPI journal article supplement (doi:10.3390/ijms241914407), 2023-09-22
Supplement: s1 [file s1]

**Overexpressed primer sequence of *L-PRLR* and *S-PRLR***

***L-PRLR***:GCTAGCGCCACCATGAAGGAAAATGCAGCATCCAGAGTGCTTTTC  
ATTCTGCTACTTTTTCTCTTCGCCAGCCTTCTGAATGGACAGTCACCTCCTG  
AAAAACCCAAGCTTATTAAATGTCGGTCTCCTGGAAAGGAAACGTTACCT  
GCTGGTGGGAGCCCGGGGCAGATGGAGGACTTCCTACCAATTACACACTG  
ACTTACCGCAAGGAAGGAGAAACACTCATCCATGAATGTCCAGACTACAA  
AACCGGGGGCCCCAACTCCTGCTACTTTAGCAAGAAGTACACCTCCATATG  
GAAGATGTATGTCATCACAGTAAGCGCCATCAACCAGATGGGAATCAGTTC  
CTCAGATCCACTTTATGTGGACGTGACTTACATAGTTGAACCAGAGCCTCCT  
GTGAACCTGACTTTGGAATTAAACATCCAGAAGATAGAAAACCATATCTA  
TGGATAAAATGGTCTCCACCCACCCTGACTGATGTAAAATCTGGTTGGTTC  
AGTATCCAGTACGAAATTCGATTAAACCTGAGAAAGCAACTGACTGGGA  
GACTCATTTTGCTCCAAAGCTGACTCAGCTTAAGATTTTCAACTTATATCCA  
GGACAGAAATACCTTGTGCAGATTCGATGCAAGCCAGACCATGGATACTGG  
AGTGAGTGGAGCCCAGAGAGCTTCATCCAGATACCTAATGACTTCCCAGTG  
AAGGATACAAGCATGTGGATCTTTGTGGGCGTCCTTTCTGCTGTCATCTGTT  
TGATTATGGTCTGGGCAGTGGCTTTGAAGGGCTATAGCATGGTGACCTGCAT  
CCTCCCACCAGTTCCAGGGCCAAAAATAAAAGGATTTGATATTCATCTGCT  
GGAGAAGGGCAAGTCCGAAGAACTTCTGAGAGCTCTGGAAAGCCAAGAC  
TTCCTTCCCCTTCTGACTGCGAGGATTTGCTGATGGAATTCATAGAGGTAG  
ATGACAGTGAGGACCAACACCTGATGCCACACCCCTCCAAAGAACACATG  
GAGCAAGGCGTGAAGCCCATGCACCTGGATCCTGACACTGACTCTGGCCG

GGGCAGCTGTGACAGCCCTTCACTCTTGTCTGAAAAGTGTGATGAACCTCA  
GGCCTATCCCTCCAAGTTCCACATTCCAGAGGGCCCTGAGAAGCTGGAGGA  
TCCCGAAACAAATCATACATGTCTCCAGGCCCTCAGAGCACAAAGTGGGG  
AAGGCAAAATCCCCTATTTTCTGGCCAACGGACCCAAATCTTCCACATGGC  
CTTTCCCGCAGCCCCCAGCCTGTACAGCCCCAGATATTCTTACCACAACAT  
TGCTGACGTGTGTGAGCTGGCCCTGGGCATGGCAGGCACCACAGCCACTC  
TGCTGGACCAAACAGACCAACATGCCTTTAAACCCTCAAAAACCATTGAG  
ACTGGCGGGGAAGGAAAGGCAGCCAAACAGAGCGAGTCAGAAGGCTACA  
GTTCCGAGCCTGACCAAGACATGGCATGGCCACTGCTCCAAGACAAAACC  
CCCTTGTTCTCTGCTAAACCCTTGGAATATGTGGAGATCCACAAGGTCAGC  
CAAGATGGAGTGCTAGCTCTGTTCCCAAACAAAATGAGAAGGTTGACGC  
CCCTGAAACCAGCAAGGAGTACTCGAAGGTGTCTCGGGTGACGGATAGCA  
ACATCCTGGTGTTGATACCGGATCTGCAAGCGCAAAACCTGACTCTGTTAG  
AAGAATCAGCCAAGAAGGCCCCGCCAGCCCTGCCATAGTCTAGA

***S-PRLR:***GCTAGCGCCACCATGAAGGAAAATGCAGCATCCAGAGTGCTTTTC  
ATTCTGCTACTTTTTCTCTTCGCCAGCCTTCTGAATGGACAGTCACCTCCTG  
AAAAACCCAAGCTTATTAAATGTCGGTCTCCTGGAAAGGAAACGTTACCT  
GCTGGTGGGAGCCCGGGGCAGATGGAGGACTTCCTACCAATTACACACTG  
ACTTACCGCAAGGAAGGAGAAACACTCATCCATGAATGTCCAGACTACAA  
AACCGGGGGCCCCAACTCCTGCTACTTTAGCAAGAAGTACACCTCCATATG  
GAAGATGTATGTCATCACAGTAAGCGCCATCAACCAGATGGGAATCAGTTC

CTCAGATCCACTTTATGTGGACGTGACTTACATAGTTGAACCAGAGCCTCCT  
GTGAACCTGACTTTGGAATTAAAACATCCAGAAGATAGAAAACCATATCTA  
TGGATAAAATGGTCTCCACCCACCCTGACTGATGTAAAATCTGGTTGGTTC  
AGTATCCAGTACGAAATTCGATTAAAACCTGAGAAAGCAACTGACTGGGA  
GACTCATTTTGCTCCAAAGCTGACTCAGCTTAAGATTTTCAACTTATATCCA  
GGACAGAAATACCTTGTGCAGATTCGATGCAAGCCAGACCATGGATACTGG  
AGTGAGTGGAGCCCAGAGAGCTTCATCCAGATACCTAATGACTTCCCAGTG  
AAGGATACAAGCATGTGGATCTTTGTGGGCGTCCTTTCTGCTGTCATCTGTT  
TGATTATGGTCTGGGCAGTGGCTTTGAAGGGCTATAGCATGGTGACCTGCAT  
CCTCCCACCAGTTCCAGGGCCAAAAATAAAAGGATTTGATATTCATCTGCT  
GGAGATATCACAGCCTTCTCGCCTTGTGTCTGTGTTTTAATCTAGA
