# Supplementary material for: High Prolactin Concentration Induces Ovarian Granulosa Cell Oxidative Stress, Leading to Apoptosis Mediated by L-PRLR and S-PRLR
Source: MDPI journal article supplement (doi:10.3390/ijms241914407), 2023-09-22
Supplement: s1 [file s1]

[illegible]

**pGWLV10-new**  
18,883 bp

CMV enhancer  
SgrDI (9649)  
SspI (9649)  
NotI (907)  
AlcI (1336)  
KHI-PpuHI (1693)  
PacI (1980)  
Acc65I (1984)  
KpnI (1988)  
AgeI (2068)  
PstI (2738)  
PaeR7I-XhoI (2955)  
NheI (3169)  
BamI (3175)  
Bsu36I (3193)  
AclII (3215)  
BlnI (3247)  
XbaI (3263)  
EcoRV (3311)  
XbaI (3374)  
XbaI enhancer  
EcoRI (4040)  
Kozak sequence  
BlnI (4226)  
AarI (4503)  
PmcI (5660)  
EM7 promoter (6708)  
AvrII  
MluI (6840)  
PstI (6851)  
SgrBI (6951)  
CAP binding site  
lac promoter  
lac operator  
M13 origin (7473)  
Bst217I  
SmaI  
SmaI ori  
SmaI poly(A) signal  
Factor Xa site  
WPRE  
CMV promoter  
T7 promoter  
CMV promoter  
AmpR promoter  
5' LTR (truncated)  
CMV promoter  
AmpR promoter

A: The empty plasmid lentiCRISPR v2; B: The empty plasmid pGWLv10-new.
